# Supplementary material for: Measurement, prevalence, causes, and health outcomes of co-existing multiple high-risk factors in pregnancy: a systematic review and meta-analysis
Source: Research Square preprint supplement (doi:10.21203/rs.3.rs-2336304/v1), 2022-12-09
Supplement: Supplementary file 1 [file 0c985b2cdbacf718236f382e.xlsx]

## Sheet: Sheet1
Additional file 2. Basic characteristics of included studies.
NO.	Author	Published Year	Title	Study design	Country/region	Research duration	Participants and sample size	Objective of the study	Data collection tool	Exposure	Outcome	Measurements of multiple risk factors of pregnancy	Main results related to the co-existence of multiple risk factors of pregnancy	Quality
1	Mark Tomlinson	2013	Multiple Risk Factors During Pregnancy in South Africa: The Need for a Horizontal Approach to Perinatal Care	Cross-sectional study	South Africa	May 2009 to December 2010	1,145 pregnanct women	To examine the prevalence and co-occurrence of these risk factors among pregnant women in Cape Town townships of South Africa.	Structured assessment questionnaire	Overlapping risk factors of pregnancy	-	The co-existing number of risk factors in pregnancy including depression symptoms during pregnancy, HIV positive, alcohol use prior to pregnancy, and low birth weight of previous children. (4 risk factors)	1. One in four (27 %) pregnant women had two or more risk factors. 2. Combinations of three or more risk factors totaled 6.5 %.	Moderate
2	Keenan E. Yanit	2012	The impact of chronic hypertension and pregestational diabetes on pregnancy outcomes	Retrospective cohort study	California, the US	2006	532,088 singleton, nonanomalous deliveries women	To examine the impact of chronic hypertension and pregestational diabetes on pregnancy outcomes.	Data were collected through the California Vital Statistics Birth Certificate Data linked with the California Patient Discharge Data as well as Vital Statistics Death Certificate Data and Vital Statistics Fetal Death File in 2006	Pregestational diabetes alone, chronic hypertension alone, or both.	The outcomes examined included gestational age at delivery, birthweight, intrauterine fetal demise (IUFD), preeclampsia, preterm birth, small for gestational age, large for gestational age, shoulder dystocia, and placental abruption.	The co-existence of chronic hypertension and pre-gestational diabetes. (2 risk factors)	1. 433 (0.1%) had both pregestational diabetes and chronic hypertension. 2. Women with both pregestational diabetes and chronic hypertension were associated with increased risks of IUFD (aOR, 7.1; 95% confidence interval [CI], 3.1–16.2), preeclampsia (aOR, 12.5; 95% CI, 10.0 –15.5), SGA (aOR, 2.2; 95% CI, 1.6-3.0), LGA (aOR, 1.8; 95% CI, 1.2-2.7), delivery at 32 weeks (aOR, 7.6; 95% CI, 5.1-11.2)…	Moderate
3	Susanne Winkel	2015	Associations of anxiety disorders, depressive disorders and body weight with hypertension during pregnancy	Prospective longitudinal study	Germany	January 2009 to June 2010	283 pregnant women from gynecological outpatient settings	To investigate the associations of anxiety and/or depressive disorders prior to pregnancy with blood pressure and arterial hypertension in pregnancy	Data were assessed via standardized interviews, questionnaires, and observations by trained assessors. Medical data about blood pressure during pregnancy were derived from the medical documentation in the German “Mutterpass.”	Maternal anxiety and depressive disorders prior to pregnancy and BMI	Blood pressure and arterial hypertension during pregnancy	Comorbid anxiety disorders and depressive disorders prior to pregnancy. (2 risk factors)	1. Women with comorbid AD had the significantly highest systolic and diastolic blood pressure measurements (115.5 mmHg systolic, 70.5 mmHg diastolic) compared to women with no AD (112.5 mmHg systolic, 68.2 mmHg diastolic) 2. Compared to no AD, women with comorbid AD had a significantly higher systolic blood pressure during the first trimester (M=114.9, SD=12.4 vs M=109.7, SD=12.9; β= 5.2, 95 % CI…	Moderate
4	Anna Wiencrot	2010	Neonatal Outcomes and Mental Illness, Substance Abuse, and Intentional Injury During Pregnancy	Retrospective cohort study	Massachusetts, the US	September 30, 2001 to December 30, 2004	176,845 pregnant women	To contribute to the literature on the co-morbidity of mental illness (MI), substance abuse (SA) and intentional injury (II) as risk factors for adverse perinatal outcomes.	Data were derived from the Massachusetts Pregnancy to Early Life Longitudinal (PELL) data system, which is a unique, population-based data system, with multiple linked data sets allowing cross-sectional and longitudinal analyses.	The co-morbidity of MI, SA and II during pregnancy	Preterm birth and low birth weight	The co-existence of mental illness/intentional injury or substance abuse/intentional injury or mental illness/intentional injury/substance abuse. (3 risk factors)	1. Among the included participants, 163 (0.09%) women had MI and II visits and 69 (0.04%) had SA and II visits. 2. Women with co-morbidities of SA and II compared to women with neither had both higher odds of PTB (OR 2.7 95% CI 1.3–5.7) and LBW birth (OR 5.3 95% CI 3.9–7.3)	Moderate
5	Tamar Wainstock	2021	Can We Predict Preterm Delivery Based on the Previous Pregnancy?	Retrospective nested case-control study	Israel	1988-2017	39,780 women with two first singleton consecutive deliveries	To identify risk factors during the first pregnancy ending at term for PTD in the subsequent pregnancy.	Data were derived from the the Soroka University Medical Center (SUMC) located in the Southern region of Israel.	Characteristics and complications of the first pregnancy	Preterm birth of the second pregnancy	Number of complications of the first pregnancy, including small for gestational age, perinatal mortality, and pre-eclampsia. (3 risk factors)	Having a history of two or more complications were significanty associated with increased risk of PTD in the subsequent pregnancy (adjusted OR = 2.20; 95%CI 1.54–3.13, p < 0.001).	Moderate
6	Nicholas J. Somerville	2019	Obstetric Comorbidity and Severe Maternal Morbidity Among Massachusetts Delivery Hospitalizations, 1998–2013	Longitudinal study	the US	1998-2013	1,185,182 delivery hospitalizations	To describe the distribution of comorbid risk among all delivery hospitalizations in Massachusetts and its association with the distribution of severe maternal morbidity.	Data were derived from the Massachusetts pregnancy to early life longitudinal data system (PELL), which is a relational data system that links infant birth and fetal death records to the corresponding maternal and infant hospital discharge administrative data for all delivery hospitalizations occurring in Massachusetts to resident women.	Comorbids during pregnancy	Severe maternal morbidity using an algorithm previously published by Callaghan et al., which uses a set of International Classification of Disease, Ninth Revision Clinical Modification (ICD-9-CM) codes to identify 25 lifesaving procedures or life-threatening events from delivery hospitalization administrative data.	Obstetric comorbidity index previously published by Bateman et al., which assigns a weight of 1–5 to each of 20 conditions identified from ICD-9-CM codes at delivery and maternal age ≥ 35 years old. (20 risk factors)	1. The yearly mean OCI score among delivery hospitalizations also rose steadily during the study period, from 0.60 in 1998 to 0.82 in 2013. 2. Deliveries with OCI scores of ≥ 10 had the highest rates of severe morbidity at 1,383.6/10,000 delivery hospitalizations.	Moderate
7	Lauren C Shuffrey	2022	Association of maternal depression and anxiety with toddler social- emotional and cognitive development in South Africa: a prospective cohort study	Prospective study	South Africa	April 2014 to August 2015	600 maternal-infant dyads	To examine associations between prenatal maternal depression and anxiety with child social-emotional and cognitive development in a cohort from the Western Cape Province of South Africa.	Data were abstracted through maternal-infant medical charts	Prenatal maternal depression and trait anxiety	Child social-emotional development, and cognitive, language and motor development	The co-existence of prenatal depression and anxiety. (2 risk factors)	1. Comorbid prenatal maternal depression and trait anxiety group was associated with the highest child social-emotional problems (mean difference: 4.33; 95% CI 2.90 to 5.67) as compared with the no prenatal depression or trait anxiety group. 2. Compared to children born to mothers with no prenatal depression or trait anxiety, children born to mothers with comorbid prenatal depression and trait an…	Moderate
8	Meliha Salahuddin	2019	Maternal comorbidity index and severe maternal morbidity during delivery hospitalizations in Texas, 2011‐2014	Cross-sectional study	Texas, the US	2011-2014	Delivery‐related hospitalizations among Texan women aged 15‐49 years were identified using the 2011‐2014 Texas all‐payer inpatient hospitalization public use data files (n = 1 434 441)	To examine the association between maternal comorbidity index and SMM among delivery hospitalizations in Texas.	Data were derived from the Texas Health Care Information Collection all‐payer inpatient hospitalization public use data file.	Maternal comorbidity index	Severe maternal morbidity	Maternal comorbidity index developed by Bateman et al. derived the original index using comorbidities, identified using ICD‐9‐CM codes from the Medicaid Analytic extract data, to predict maternal end‐organ injury or death, which assigned a weight to each comorbid condition based on the strength of association between the condition and the outcome. The comorbidities that were included in the index…	1. The majority (60.5%) of delivery hospitalizations had 0 comorbidity score, followed by 33.0%, 3.9%, and 2.6% with scores of 1‐2, 3‐4, and ≥5 score, respectively. 2. With each unit increase in maternal comorbidity index score, the odds of SMM increased by 1.43 (95% CI 1.42‐1.43). 3. When the maternal comorbidity index was examined categorically, and 0 score was set as the reference group, a dos…	Moderate
9	Rebecca Reno	2021	Preterm birth and social support services for prenatal depression and social determinants	Retrospective cohort study	San Francisco, the US	October 2017 to March 2019	47 women presenting symptoms of preterm labor or admitted for PTB from an urban county hospital in the San Francisco Bay Area.	To: (1) examine the unique and cooccurring associations between social determinants ofhealth and depression symptoms and gestational age at birth and (2) assess the potential benefit of receipt of behavioral health services on gestational age.	Data collection tools were designed using the Dahlgren and Whitehead rainbow model, which is a social-ecological framework that positions health as a function ofindividual constitutional factors, lifestyles, and behaviors embedded within upstream social, community, cultural, and environmental factors.	Depression symptom during pregnancy and high exposure to adverse social determinants (including employment, economic issues, food security, housing stability, access and acceptability of health care, social support, educational level, and intimate partner violence).	Gestational age at birth	Co-occurring depression symptom and high exposure to adverse social determinants. (2 risk factors)	Participants experiencing both depression symptoms and more than four adverse social determinants had gestational ages at birth that were shorter by 3.06 weeks (95% CI: -5.05,-1.07).	Moderate
10	Shahirose Sadrudin Premji	2020	Comorbid Anxiety and Depression among Pregnant Pakistani Women: Higher Rates, Different Vulnerability Characteristics, and the Role of Perceived Stress	Prospective cohort study	Pakistan	Not report	300 pregnant women	To: (1) explore the prevalence and patterns of comorbid antenatal anxiety and depressive symptoms in the mild-to-severe and moderate-to-severe categories among women in a LMI country like Pakistan and (2) understand the risk factors for comorbid anxiety and depressive symptoms. Using a prospective cohort design, a diverse sample of 300 pregnant women from four centers of Aga Khan Hospital for Wom…	Data were collected through questionnaires.	Socio-demographic, geographic and socio-economic factors, family composition, cultural factors, health habits), medications and supplements during pregnancy, level of allostatic load, and perceived stress.	Comorbid anxiety and mild-to-severe depression; and comorbid anxiety and moderate-to-severe depression during pregnancy.	The co-existence of anxiety and depression. (2 risk factors)	1. The prevalence of comorbid anxiety and mild-to-severe depressive symptoms during pregnancy was 13.5% (95% CI 9.9–18.0). 2. The prevalence of comorbid anxiety and moderate-to-severe depressive symptoms was 5.0% (14/282) at both time points.	Moderate
11	Chelsea A. Obrochta	2020	Psychological distress in pregnancy and postpartum	Prospective cohort study	the US and Canada	2016–2018	720 pregnanct women	To: (1) describe the prevalence and comorbidity of psychological distress in the prenatal and postnatal periods, and determine whether certain patterns of prenatal psychological distress were more likely to predict postpartum psychological distress. (2)explore sociodemographic and maternal health factors and adverse birth outcomes and their associations with prenatal psychological distress.	Data were collected from interview and medical records abstraction	Prenatal psychological distress	Postpartum psychological distress	Number of prenatal psychological distress, including depression, stress, and anxiety. (3 risk factors)	Participants with two or more prenatal psychological distress measures were significantly more likely to experience postpartum depression (aRR=7.04, 95% CI=2.60-19.06), stress (aRR=5.48, 95% CI=3.18-9.44), and anxiety (aRR=5.12, 95% CI=3.17-8.27) compared to participants with no prenatal depression, stress, or anxiety.	Moderate
12	Joana Sousa Nunes	2020	The Influence of Preeclampsia, Advanced Maternal Age and Maternal Obesity in Neonatal Outcomes Among Women with Gestational Diabetes	Retrospective cohort study	Portugal	2017-2018	301 unifetal pregnancies	To analyze adverse fetal or neonatal outcomes in women with gestational diabetes, including fetal death, preterm deliveries, birthweight, neonatal morbidity andmortality, as well as the synergic effect of concomitant pregnancy risk factors and poor obstetric outcomes, as advanced maternal age, maternal obesity and pre-eclampsia in their worsening.	Data were collected from the medical records registered in HSO’s health informatic programs Sclinico and Obscare.	Preeclampsia, advanced maternal age and maternal obesity	Neonatal outcomes, including fetal death, preterm deliveries, birthweight, neonatal morbidity and mortality.	The co-existence of advanced maternal age with gestational diabetes, pre-eclampsia with gestational diabetes and maternal obesity with gestational diabetes. (4 risk factors)	1. The incidence of neonatal morbidity, newborns with low and very lowbirth weight and of preterm deliveries was higher in those with the co-exisitence of pre-eclampsia and gestational diabetes (22.20%,33.30% and 61.10% in pregnant women with pre-eclampsia and gestational diabetes versus 5.30%, 6.00% and 7.10% in pregnant women with only gestational diabetes, respectively). 2. In respect to the c…	Moderate
13	James Samwel Ngocho	2019	Depression and anxiety among pregnant women living with HIV in Kilimanjaro region, Tanzania	Cross-sectional study	Tanzania	Juy 2016 to August 2017	200 pregnant women living with HIV	To determine prevalence of depression and anxiety and identify factors associated with these common mental health disorders among HIV-infeced pregnant women in Tanzania.	Structured survey was verbally administered in Swahili by a trained data collector.	-	Depression and anxiety in pregnancy	The co-existence of depression, anxiety and HIV positive. (3 risk factors)	Comorbid depression and anxiety was associated with being single (aOR = 4.5, 95%CI = 1.0–19.1), HIV shame (aOR = 1.2, 95%CI = 1.1–1.3) and lifetime experience of violence (aOR = 3.4, 95% CI = 1.2–9.6).	Moderate
14	Jessica A. McPherson	2012	Adverse outcomes in twin pregnancies complicated by early vaginal bleeding	Retrospective cohort study	The US	1990-2008	2,106 twin pregnancies	To estimate the risks of adverse pregnancy outcomes associated with early vaginal bleeding in twin pregnancies.	Data were primarily extracted from medical records, and then supplemented by the patient.	Twin pregnancies with vaginal bleeding	Adverse pregnancy outcomes, including pre-eclampsia, abruption, preterm premature ruptire of membranes (PPROM), preterm birth, and intrauterine growth restriction (IUGR).	The co-existence of twin pregnancies and early vaginal bleeding. (2 risk factors)	Twin pregnancies with early vaginal bleeding had significantly higher risks of abruption (aOR: 7.21, 95% CI: 3.61-14.41), PPROM (aOR: 2.48, 95% CI: 1.68-3.68), and preterm birth (aOR: 1.72, 95% CI: 1.17-2.54) compared to twin pregnancies without bleeding.	High
15	Lynn R. McDonald	2020	Syndemic of Lifetime Mental Illness, Substance Use Disorders, and Trauma and Their Association With Adverse Perinatal Outcomes	Retrospective cohort study	The US	2012	1,988 women who delivered during the study period.	To examine whether psychosocial factors (mental illness, substance use disorders, and interpersonal trauma) were independently and synergistically associated with adverse perinatal outcomes.	Data were collected from the electronic medical record by trained medical and nursing research personnel.	Psychosocial factors, including mental illness, substance use disorders, and interpersonal trauma during preganncy.	Adverse perinatal outcome, which was a dichotomous composite variable of the presence of at least one of the following variables: preterm delivery (<37 gestational weeks), low birth weight (<2,500 g), neonatal intensive care unit (NICU) admission, or stillbirth.	Number of psychosocial factors. (3 risk factors)	1. There were 7.5% (n = 124) who reported two psychosocial factors, and 3.1% (n = 51) who reported all three psychosocial factors. 2. Having a greater number of psychosocial factors was significantly and positively associated with adverse perinatal outcomes (for trend, p = .01, Gamma = .16). 3. Among women who reported all three psychosocial factors, the odds of an adverse perinatal outcome were …	Moderate
16	Varun Manoharan	2020	Impact of comorbid polycystic ovarian syndrome and gestational diabetes mellitus on pregnancy outcomes: a retrospective cohort study	Retrospective cohort study	Australia	February 2015 to January 2019	1,545 women with gestational diabetes mellitus	To retrospectively evaluate the impact of comorbid polycystic ovarian syndrome (PCOS) on pregnancy outcomes among with women with gestational diabetes mellitus (GDM).	Data were collected through a standardised, self-report questionnaire and medical history.	Comorbid polycystic ovarian syndrome and gestational diabetes mellitus	Pregnancy and neonatal outcomes	The co-existence of polycystic ovary syndrome and gestational diabetes mellitus. (2 risk factors)	1. Women with PCOS and GDM had a higher body mass index (31.5 kg/m2 vs 27.7 kg/m2, p < 0.001), significant gestational weight gain (12.6 kg vs 11.5 kg, p = 0.016), and more frequent use of pharmacotherapies to manage their GDM (57.7% vs 45.2%, p < 0.001). 2. There was a significantly higher incidence of preeclampsia among GDM+PCOS+ women compared to those without PCOS.	Moderate
17	Tuija Männistö	2016	Maternal psychiatric disorders and risk of preterm birth	Observational cohort study	the US	2002-2008	223,394 singleton pregnancies	To study the effect of maternal psychiatric disorders (depression, anxiety disorder, bipolar disease, schizophrenia, unspecified psychiatric disorder, and comorbid conditions) and odds of preterm birth.	Data were extracted from electronic medical records	Maternal psychiatric disorders, including depression, anxiety, bipolar disorder, schizophrenia and unspecified psychiatric disorder during pregnancy.	Preterm birth	The co-existence of depression, anxiety, and bipolar disease. (3 risk factors)	1. The highest odds of preterm birth were observed among women with depression with anxiety disorder (OR 2.31, 95% CI 1.93-2.78). 2. Women with depression with anxiety disorder had the highest odds of preterm birth <34 weeks (OR 3.06, 95% CI 2.36-3.97) and <28 weeks’ gestation (OR 2.99, 95% CI 1.83-4.90) (Table 2).	High
18	Najmeh Maharlouei	2021	Depression and anxiety among pregnant mothers in the initial stage of the Coronavirus Disease (COVID-19) pandemic in the southwest of Iran	Cross-sectional study	Iran	March 24 to April 7, 2020	540 pregnant mothers	To investigate depression, anxiety, and stress levels of pregnant mothers in the initial stage of the COVID-19 infection in the southwest of Iran.	Data were collected through online questionnaires	Medical histories of pregnant mothers	The levels of depression, anxiety and stress in pregnant mothers	Number of comorbidities, including hypothyroidism, diabetes mellitus/gestational diabetes mellitus, other endocrine disorders, headache, hypertension, cardiovascular diseases, immune thrombocytopenic purpura. (7 risk factors)	1. Among the included 540 women, 29 mothers (5.4%) had two comorbidities, and one mother (0.2%) reported three comorbidities. 2. Respondents who had two or more comorbidities had a 3.7 times higher chance of achieving an abnormal DASSA level (p = 0.001; CI for OR 1.7–8.2).	Moderate
19	Shuangshuang Ma	2022	Association of maternal prenatal depression and anxiety with toddler sleep: the China‑Anhui Birth Cohort study	Prospective cohort study	China	January to September, 2008	2,552 pregnant women in the third trimester	To investigated whether maternal depression comorbid with anxiety worsens toddler’s sleep problems.	Information concerning sociodemographic characteristics and lifestyle was collected through the face-to-face interview by trained researchers.	Maternal prenatal depression and anxiety during pregnancy	Toddler sleep problems	Comorbid depression and anxiety. (2 risk factors)	1. The pevalence of prenatal depression comorbid with anxiety was 9.0%. 2. Compared with mothers without prenatal anxiety and depression, mothers with comorbid depression and anxiety continued to be strongly associated with BISQ assessed toddlers’ sleep problem in adjusted models for covariates (OR = 2.09, 95% CI: 1.22–3.57).	Moderate
20	Abigail Lopez	2019	Maternal Mental Illness Is Associated with Adverse Neonate Outcomes: An Analysis of Inpatient Data	Longitudinal study	The US	2008-2010	178,737 pregnant women	To assess the role of maternal mental illness and its association to poor fetal growth and preterm delivery in one of the most socioeconomically disadvantaged areas of California.	Data were extrcted from inpatient information of California’s Office of Statewide Health Planning and Development (OSHPD) files	Maternal mental illness	Adverse neonatal outcome	The Charlson comorbidity index which provides a score for comorbidities for each discharged based on ICD-9-CM. (17 items)	An increasing number of co-morbidities was also associated with poor fetal growth and preterm delivery.	Moderate
21	Siang Ing Lee	2022	Epidemiology of pre-existing multimorbidity in pregnant women in the UK in 2018: a population-based cross-sectional study	Cross-sectional study	The UK	January 1 to 31 December, 2018	71,522 pregnant women	To estimate the prevalence of pre‑existing multimorbidity (two or more long‑term physical or mental health conditions) in pregnant women in the United Kingdom (England, Northern Ireland, Wales and Scotland).	This study used three datasets from different health settings, covering all four nations in the UK: Clinical Practice Research Datalink, (CPRD, England, Northern Ireland, Scotland and Wales), Secure Anonymized Information Linkage (SAIL, Wales) and Scottish Morbidity Records (SMR, Scotland).	Pre-existing multimorbidity in pregnant women	-	The presence of two or more pre-existing long-term physical or mental health conditions prior to the index pregnancy. (79 long-term chronic conditions)	1. The prevalence of multimorbidity was 44.2% (95% CI 43.7–44.7%), 46.2% (45.6–46.8%) and 19.8% (18.8– 20.8%) in CPRD, SAIL and SMR respectively. 2. The most prevalent combinations were depression and anxiety in primary care datasets (2.2 and 2.7% of pregnant women in CPRD and SAIL respectively) and common mental health disorders and asthma for SMR (3.2%). 3. When only considering physical condit…	Moderate
22	Mahmoud Abdelwahab	2022	Risk factors for preterm birth among gravid individuals receiving buprenorphine for opioid use disorder	Retrospective Cohort Study	The US	July 1, 2013 to June 30, 2018.	507 pregnant women with opioid use disorder	To determine the rate of preterm birth and risk factors for preterm birth in pregnancies complicated by opioid use disorder maintained on buprenorphine.	The cohort of patients was identified through an information warehouse search of the electronic medical record.	Buprenorphine receiving for opioid use disorder (OUD)	The prevalence of preterm birth(PTB)	The co-existence of opioid use disorder, psychiatric disorders, and hepatitis C infection. (3 risk factors)	1.Preterm birth rate in women who have more than two psychiatric disorder but comorbidity not present is 92/389 (23.7%) ; in women who have more than two psychiatric disorder when comorbidity is present is 23/118 (19.5%). 2.Among individuals using 0, 1, 2, or 3 or more illicit supplements in addition to confirmed buprenorphine for opioid use disorder, the preterm birth rate was 27.4% (reference),…	High
23	Kazuyoshi Aoyama	2019	Association of Maternal Age With Severe Maternal Morbidity and Mortality in Canada	A nationwide population-based cohort study	Canada	April 1, 2004 to March 31, 2015	3 ,162,303 pregnant women	To investigate the association of maternal age, adjusting for patient-level and hospital-level factors, with severe maternal morbidity (SMM) and maternal death in Canada.	Data were derived from the Discharge Abstract Database (DAD) of the Canadian Institute for Health Information (CIHI).	Maternal age at the index delivery	The primary outcome was SMM during an episode of care. Maternal death (during pregnancy and within 6 weeks after termination of pregnancy) was the secondary outcome.	Maternal comorbidity index (≥2). (34 chronic conditions)	1. the prevalence of maternal comorbidity(≥2) was 4.3% (137434) 2.Odds Ratios for SMM and Mortality with maternal comorbidity index (≥2) were 3.67 (3.56-3.78), 10.20 (10.20-10.20) ,respectively.	Moderate
24	Eva Asselmann	2018	Maternal anxiety and depressive disorders prior to, during and after pregnancy and infant interaction behaviors during the Face-to-Face Still Face Paradigm at 4months postpartum: A prospective-longitudinal study	A prospective-longitudinal study	Germany	January 2009 to September 2012	533 pregnant women	To investigate the role of maternal anxiety and depressive disorders during pregnancy for a variety of (changes in) infant behavioral outcomes including positive and negative facial expressions and vocalizations as well as distancing and touching behavior over the course of the FFSFP at 4 months.	Standardized diagnostic interviews, questionnaires and behavioral observation.	Maternal anxiety or/and depressive disorders prior to, during and after pregnancy	Infant positive and negative facial expressions and vocalizations, distancing behavior, self- and object-touch, observed during the FFSFP at 4 months postpartum.	Maternal anxiety and depressive disorders during pregnancy. (2 risk factors)	1.Among the included 283 women, 68 mothers(24.0%) were comorbid with anxiety and depression until T6. 2.the M with 95%CI with maternal comorbid anxiety and depression until T6 for Positive facial expression facial expression of Play vs. still face[−0.083, −0.110-−0.065], Still face vs. reunion[0.094, 0.074-0.120], Play vs. reunion [0.015, −0.005-0.036] 3.the M with 95%CI with maternal comorbid an…	High
25	Blair O. Berger	2021	Adverse Birth Outcomes Among Women of Advanced Maternal Age With and Without Health Conditions in Maryland	Retrospective study	Maryland, the US	2004 to 2015	14,933 prognant women	To assess the association between advanced maternal age (AMA) and adverse birth outcomes among women with and without pre-existing and pregnancy-related health conditions in Maryland.	Data were pooled from the Maryland Pregnancy Risk Assessment Moni- toring System (PRAMS) survey.	Health conditions and AMA.	Birth outcomes including PTB regardless of birthweight (before 37 completed weeks gestation), PTB without LBW, LBW regardless of term (<2,500 g), LBW term births, and LBW PTB.	The co-existence of advanced maternal age with hypertensive disorders/asthma/pre-gestational or gestational diabetes. (5 risk factors)	1.the adjusted OR and 95%CI of the co-existence of advanced maternal age and pregestational diabetes for PTB [1.24 (0.63–2.46)], for PTB without LBW [1.72 (0.62–4.50)], for LBW [0.98 (0.55–1.77)], for LBW term [1.75 (0.74–4.13)], for LBW preterm [0.81 (0.43–1.51)] 2.the adjusted OR and 95%CI of the co-existence of advanced maternal age and hypertensive disorders for PTB [1.47(1.02–2.14) ], for PT…	High
26	Amy L. Bird	2017	Maternal health in pregnancy and associations with adverse birth outcomes: Evidence from Growing Up in New Zealand	Prospective cohort study	New Zealand	2009-2010	6,822 pregnant women	To examine prospectively multiple indicators of pregnancy health and associations with adverse birth outcomes within a large, diverse sample of contemporary women.	Each enrolled woman in the last trimester of pregnancy was interviewed through computer-assisted face-to-face interviews. Birth outcomes were obtained by data linkage with perinatal medical records.	multiple indicators of pregnancy health	Three birth outcomes: low birth weight (LBW), pre- term birth (PTB) and delivery type.	Two or more of the following risk factors: overweight or obese, weight gain during pregnancy, smoking status, doctor-diagnosed illness (diabetes, asthma, heart disease, high blood pressure, anaemia), disability, cigarette smoking, alcohol use, lack of regular activity. (11 risk factors)	1.Women with two (OR = 2.24, 95%CI 1.40-3.52) or three or four (OR = 3.86, 95%CI 1.66-8.11) risk factors were at increasing risk of having a LBW infant. 2.Women with two or three risk factors (OR = 2.87, 95%CI 1.89-4.28) were at greater risk of PTB. 3.Women with two (OR = 2.39, 95%CI 1.60-3.50) or three (OR = 6.24, 95%CI 1.30-23.24) risk factors were at increasing risk of having a SGA infant. 4.W…	Moderate
27	R. Bond	2017	Diabetes risk in women with gestational diabetes mellitus and a history of polycystic ovary syndrome: a retrospective cohort study	Retrospective cohort study	Quebec, Canada	April 1, 1990 to March 31, 2012.	34,686 women with gestational diabetes during pregnancy (live birth)	To investigate whether polycystic ovary syndrome further increases postpartum diabetes risk in women with gestational diabetes mellitus and to explore relationships between polycystic ovary syndrome and incident diabetes in women who do not develop gestational diabetes.	Data merged from the Quebec birth and death registries and the Quebec Physician Services Claims and Hospitalization Discharge Databases.	Polycystic ovary syndrome(PCOS) and gestational diabetes mellitus(GDM).	Development of diabetes.	The co-existence of polycystic ovary syndrome and gestational diabetes mellitus. (2 risk factors)	1.513 (1.5%) mothers with both GDM and PCOS 1.In women with both GDM and a PCOS history, diabetes incidence was 24.85 per 1000 person-years (95% CI 20.96, 29.47), corresponding to 132 cases of diabetes. 2. PCOS was conclusively associated with incident diabetes in women with a history of GDM [hazard ratio (HR) aHR 1.52, 95% CI 1.27, 1.82].	High
28	Clare C Brown	2020	Associations Between Comorbidities and Severe Maternal Morbidity	Retrospective cohort study	the US	2016-2017	1,480,925 deliveries in the data	To evaluate the associations between the number of chronic conditions and maternal race and ethnicity (“race”) with the risk of severe maternal morbidity.	Data were derived from the Healthcare Cost and Utilization Project National Inpatient Sample, the National Inpatient Sample, and the Agency for Healthcare Research and Quality	The number of comorbidities and maternal race	Severe maternal morbidity.	The co-existence of two, or three or more comorbidities. (29 diseases items)	1.Women with two comorbidities (rate=379.9; OR=8.1 [95% CI: 7.8-8.5]), or three or more comorbidities (rate=560; OR=12.1 [95% CI: 11.5-12.7]) were at increasing risk of severe maternal morbidity. 2.Deliveries among women with two or three comorbidities had further increased odds of severe maternal morbidity (OR: 6.6 [95% CI: 6.3-6.9] and OR: 9.1 [95% CI: 8.7-9.6]) and of severe maternal morbidity…	High
29	Hilary K. Brown	2016	Perinatal Health of Women with Intellectual and Developmental Disabilities and Comorbid Mental Illness	Retrospective cohort study	Ontario, Canada	April 1, 2002 to March 31, 2012.	3,932 pregnant women	To: (1) describe a cohort of women with dual diagnosis in terms of their social and health characteristics and (2) compare their risks for adverse maternal and neonatal outcomes to those of women with IDD only.	Data were obtained from the Institute for Clinical Evalua- tive Sciences (ICES).	Dual diagnosis and IDD only	Primary maternal outcomes were gestational diabetes, gestational hypertension, preeclampsia/eclampsia, and venous thromboembolism. Primary neonatal outcomes were preterm birth, small for gestational age, and large for gestational age. We also examined several secondary outcomes.	Intellectual and developmental disabilities and mental illness (2 risk factors)	1.In the sample, there were 2,080 women(52.9%) with co-occurring IDD and mental illness. 2.Infants born to women with dual diagnosis had increased risks for preterm birth (adjusted relative risk [aRR] 1.31, 95% confidence interval [CI] 1.08 to 1.59) and neonatal morbidity (aRR 1.35, 95% CI 1.03 to 1.76) , small for gestational age (aRR 1.04, 95% CI 0.90 to 1.19), large for gestational age (aRR 0.…	Moderate
30	Kathleen Browne	2021	The joint effects of obesity and pregestational diabetes on the risk of stillbirth	Retrospective cohort study	Texas, the US	2006 to 2014	3,097,123 pregnant women	To determine the risk of stillbirth in pregnancies complicated by both conditions.	Data were derived from the Texas vital records.	PGDM, obesity, PGDM and obesity	The rate of stillbirths.	The co-existence of pre-gestational diabetes with overweight, obesity or morbidly obese. (2 risk factors)	1.The rate of stillbirth further increased with coexistence of PGDM to 209.8 per 10,000 pregnancies in the morbidly obese group. 2.Using normal weight non-diabetics as the baseline comparison group, the aHR was 12.86 [9.36, 17.67] for the morbidly obese with PGDM. 3.The highest risk of stillbirth was seen between 37 and 39 weeks, when the aHR in the diabetic morbidly obese group was 25.34 [15.58,…	High
31	Li-Fen Chen	2021	Association between the use of antidepressants and the risk of preterm birth among pregnant women with depression: a retrospective cohort study in Taiwan	Retrospective cohort study	Taiwan, China	2000 to 2012	10,614 pregnant women	To investigate the association between the use of antidepressants and the risk of preterm birth in pregnant women who have had perinatal depression.	Data were extracted from the Taiwanese National Health Insurance Research Database (NHIRD).	Use of antidepressants	The risk of preterm birth	1.The co-existence of perinatal depression and antidepressants. (2 risk factors) 2.The co-existence of perinatal depression, antidepressants, anxiety disorder, multiple gestation, diabetes mellitus, hypertension, dyslipidemia, reproductive tract infection, pre-eclampsia, placenta prevail, polycystic ovaries or pregnancy with history of infertility. (12 risk factors)	1.Compared with the women with perinatal depression who were not using antidepressants during pregnancy, the women taking antidepressants had a 1.762-fold risk of preterm birth (adjusted HR=1.762, 95% CI 1.351 to 2.294, p<0.001). 2.Women undergoing antidepressant treatment in their third trimester (aHR=2.009, 95% CI 1.675 to 2.587, p<0.001) had the highest aHR, followed by those in their first tr…	Moderate
32	Mi Jin Choi	2022	Risk and Risk Factors for Postpartum Type 2 Diabetes Mellitus in Women with Gestational Diabetes: A Korean Nationwide Cohort Study	Retrospective cohort study	Korea	January 1, 2004 to December 31, 2016	1,647,903 women	To assess these risk and risk factors for postpartum type 2 diabetes mellitus (T2DM) after gestational diabetes more accurately through a population-based study to provide basic data for prevention strategies.	Data were extracted from the NHIS–NHID, the single insurer of the nation and covers the entire population of Korea.	Risks brought by gestational diabetes to T2DM	The incidence of diabetes in the late postpartum period (1 year after).	The co-existence of gestational diabetes with obesity, maternal age, family history of diabetes, hypertension, and insulin use. (6 risk factors)	1.Women with both obesity and gestational diabetes had a higher risk of T2DM (HR, 2.84; 95% CI, 2.70 to 2.98; P<0.001) than in the non-obese group (HR, 2.31; 95% CI, 2.24 to 2.37; P<0.01) 2.Those with both obesity and gestational diabetes showed a 7.59-times (95% CI, 7.33 to 7.86; P<0.001) greater risk of developing postpartum T2DM compared to those without both obesity and gestational diabetes.	Moderate
33	Lisa M. Christian	2021	Maternal depressive symptoms, sleep, and odds of spontaneous early birth: implications for racial inequities in birth outcomes	Prospective study	the US	2009 to 2018	317 women in mid-pregnancy	To examine the role of depressive symptoms and sleep quality in predicting the odds of spontaneous shortened gestation .	Core questionnaire measures of sleep and depressive symptoms	Maternal depressive symptoms and sleep	Odds of shortened gestation	Co-occurrence of depression and poor sleep quality during pregnancy. (2 risk factors)	Women with comorbid poor sleep and depressive symptoms exhibited higher odds of spontaneous shortened gestation than those with neither risk factor (39.2% versus 15.7% [OR (95% CI) = 2.69 (1.27, 5.70)], p = 0.01).	Moderate
34	Swee May Cripe	2011	Risk of preterm delivery and hypertensive disorders of pregnancy in relation to maternal co-morbid mood and migraine disorders during pregnancy	Prospective cohort study	the US	1996 to 2008	3,432 pregnant women	To valuate the risks of preterm delivery and hypertensive disorders of pregnancy among pregnant women with mood and migraine disorders.	Structured interviewer administered questionnaire and and medical records.	Isolated mood, isolated migraine disorder and co-morbid mood-migraine disorders	Preterm delivery and hypertensive disorders of pregnancy	Co-morbid mood-migraine disorders. (2 risk factors)	1.In this sample of women, 73 (2.1%) had co-morbid mood-migraine disorders. 2.Women with co-morbid disorders were almost twice as likely to deliver preterm (adjusted RR = 1.87, 95% CI 1.05, 3.34) compared with the reference group. 3.Women with co-morbid mood-migraine disorders had increased risk (adjusted RR = 1.94, 95% CI 0.94, 3.98) of spontaneous preterm delivery and increased risk (adjusted R…	High
35	Shayna D. Cunningham	2017	Maternal Medical Complexity: Impact on Prenatal Health Care Spending among Women at Low Risk for Cesarean Section	Prospective cohort study	the US	January 2010 to December 2011	95,663 pregnant women	To examine the association between number of comorbid conditions and prenatal health care expenditures, and to determine expected additional spending for women with each condition.	Data were from a national, multipayer database consisting of health care claims for more than 50 million Americans per year from all 50 states and the District of Columbia maintained by the HCCI.	One or more comorbid conditions.	Allowed charges from a commercially insured population	Co-existence of any two or more of the ten comorbidities (hypertension, including preeclampsia and eclampsia; diabetes; gestational diabetes; thyroid disorders; obesity; asthma; infections, such as HIV and toxoplasma; mental health conditions; substance use; and amniotic fluid issues including polyhydramnios and oligohydramnios). (10 comorbidities)	1.8049 (8.3%) pregnant women had two or more comorbidities 2.the β (Standard Error) of the association between pregnant women had two comorbidities and prenatal health care expenditures for all birth [2,030 (39)], Vaginal Births [2,044 (47)], Cesarean Deliveries [1,942 (72)]. 3.2.the β (Standard Error) of the association between pregnant women had three or more comorbidities and prenatal health c…	Moderate
36	Mary-Rose Faulkner	2020	Collective impact of chronic medical conditions and poverty on perinatal mental illness: population-based cohort study	Observational cohort study	Ontario, Canada	April 1, 2005 to March 31, 2015	853,433 women with a singleton live birth and no recent mental healthcare	To : (1) estimate the prevalence of co-occurring CMC and poverty in pregnant women and (2) examine their collective impact on perinatal mental illness risk.	Health administrative datasets were accessed at ICES, a not-for-profit, independent agency that stores data on the use of the healthcare system.	Poverty and 16 CMCs that are common in reproductive-aged women and could have an adverse impact on pregnancy	The evaluation of perinatal mental illness.	The co-existence of any two or more of the 16 chronic medical conditions. (16 chronic conditions)	1.In the cohort (n=853433), the prevalence of co-occurring CMC and poverty was 5.0%. 2. Measures of additive interaction for the collective impact of CMC and poverty on perinatal mental illness risk were not statistically significant (RERI 0.02, 95% CI -0.01 to 0.06; SI 1.09, 95% CI 0.95 to 1.24). 3.Among women with ≥1 CMCs, 19.8% experienced a perinatal mental illness, compared with 15.6% of tho…	Moderate
37	Tiffany Field	2010	Comorbid Depression and Anxiety Effects on Pregnancy and Neonatal Outcome	Prospective cohort study	Not report	Not report	911 pregnant women in second trimester of pregnancy	To explore the separate effects of prenatal depression and anxiety and the effects of comorbid depression and anxiety on: 1)mothers' mood states including depression, anxiety and anger and on their daily hassles and sleep disturbances as well as their EEG and biochemistry (cortisol, norepinephrine, epinephrine, dopamine and serotonin) at the prenatal and the neonatal periods; and 2)neonatal outco…	the Center for Epidemiological Studies-Depression scale (CES-D) (Radloff, 1977), the State Anxiety Inventory (STAI) (Spielberg, Gorsuch, & Lushene, 1970), the State Anger Inventory (STAXI) (Spielberger, Ritterband, Sydeman, Reheiser, & Unger, 1995), the Behavioral Inhibition Scale (BIS) (Carver & White, 1994) the Daily Hassles Scale (Field et al., 1983), the Sleep Disturbance Scale (Verran & Snyd…	Depression and anxiety	Mothers' mood states and neonatal outcomes.	Comorbid depression and anxiety. (2 risk factors)	1. the number of comorbid anxiety and depression was 308 (33.8%). 2. Means for Neonatal Outcome Variables of comorbid depression and anxiety: prematurity (14.5%,p=0.01), bith weight [3224.29(483.24), p=0.003 ], birth length[49.56 (4.96), p=0.05] EEG for mother[-0.16 (0.19), p=0.01] EEG for infant[-0.08 (0.15), p=0.003]	Low
38	Heather A. Flynn	2015	Relationship of prenatal depression and comorbidities to infant outcomes	Prospective cohort study	Northwest Florida, the US	2010 to 2012	419 women presenting consecutively for prenatal care at a health system serving primarily Medicaid patients	To provide information on the effect of prenatal depression and anxiety as assessed in the context of obstetrical care on key infant outcomes (gestational age at birth, birth weight, and APGAR scores), while simultaneously considering interactions with maternal medical conditions among primarily Medicaid enrollees.	Data were extracted from medical records at an obstetrical clinic located in Northwest Florida.	Depression, maternal anxiety and chronic medical conditions	Poor birth outcomes	1.The co-existence of depression with anxiety, diabetes, high blood pressure or kidney problems 2.The co-existence of anxiety with diabetes, high blood pressure or kidney problems. (5 risk factors)	1.For the gestational age outcome, women with both depression and anxiety had infants born at 38.4 weeks on average (S.E. = 1.1) as compared to women with anxiety only (no depression; mean gestational age = 35.5 weeks, S.E. = 1.6, p < .04). 2.For 5-minute APGAR women with both depression and high blood pressure (mean = 37.8, S.E. = .9, p < .04), and as compared to women with no depression and no …	Moderate
39	Lauren E. Friedman	2017	Migraine and the risk of post-traumatic stress disorder among a cohort of pregnant women	Cross-sectional study	Lima, Peru	February 2012 to March 2014	2,922 pregnant women	To examine the association between migraine and PTSD among pregnant women.	Structured questionnaires	Type of migraine and depression	The prevalence of PTSD	The co-existence of migraine and depression. (2 risk factors)	1.Compared to the reference group, participants suffering from depression and any migraine had odds of PTSD (OR = 2.09; 95% CI: 1.49–2.92), depression and probable migraine had odds of PTSD (OR = 1.59; 95% CI: 1.07–2.35) , depression and migraine had odds of PTSD (OR = 3.13; 95% CI: 1.91–5.11) after adjusting for potential confounders.	Moderate
40	Samereh Ghelichkhani	2021	Pregnancy outcomes among SARS-CoV-2-infected pregnant women with and without underlying diseases: a case-control study	Case-control study	Iran	March 2020 to April 2021.	98 pregnant women	To examine the pregnancy outcomes in women infected with the severe acute respiratory syndrome coronavirus 2 (SARS-CoV-2) with and without underlying diseases in western Iran.	Data were collected by a checklist	Underlying diseases(such as heart conditions, diabe- tes, autoimmune diseases, chronic respiratory conditions, cancer, or asthma.)	Risk factors and pregnancy outcomes	The co-existence of COVID-19 and underlying diseases of heart conditions, diabetes, autoimmune diseases, chronic respiratory conditions, cancer, or asthma. (7 risk factors)	1.The odds of preterm labor in women with the co-existence of COVID-19 and underlying diseases (OR=5.95, 95% CI (3.01, 7.15), p=0.034).	Moderate
41	Michael Hendryx	2014	Identifying Multiple Risks of Low Birth Weight Using Person-Centered Modeling	Cross-sectional study	West Virginia, the US	January 1, 2010 to July 31, 2011	28,820 women with live singleton births	To identify subgroups of women with multiple co-occurring risks and to examine the relationship of these risk classes to low birth weight outcome.	Data were obtained from the West Virginia Birth Score- Developmental Risk Screen and Newborn Hearing Screen.	Multiple potential risks of low birth weight outcomes (including marital status, stress, mother’s age, parity status, reported smoking and drug use during pregnancy, delayed prenatal care, Medicaid coverage, uninsurance, and low education)	Low infant birth weight	The co-existence of not married, stress during pregnancy, nulliparous, young mother, smoking, drug use, no prenatal care in first trimester, Medicaid, uninsured, less than high school education. (10 risk factors)	Odds ratio and 95%CI with the risk of Low Birth Weight 1. The co-existence of unmarried, first birth, young mother(age ≤18), low education and medicaid: 1.95 (1.55–2.47) 2. The co-existence of high stress, smoking, drug use, unmarried, medicaid, and late prenatal care: 4.78 (4.07–5.61)	Moderate
42	Jia-Lun Huang	2020	Preeclampsia and the Risk of Pancreatitis: A Nationwide, Population-Based Cohort Study	Retrospective cohort study	Taiwan, China	January 1, 1998 to December 31, 2010	86,315 pregnant women	To study the relationship between preeclampsia and the risk of pancreatitis.	Data were extracted from the Taiwanese National Health Insurance Research Databases (NHIRD)	Preeclampsia with comorbidities	Incidence of pancreatitis	Preeclampsia comorbid with alcohol-related diseases, biliary stone, diabetes mellitus, hyperlipidemia, hypertension, hepatitis B, hepatitis C, and the age of 36-45 years old. (9 risk factors)	1.The risk of pancreatitis incidence in preeclampisa with the age of 36-45 years old was (aHR=1.40, 95% CI: 0.74-2.64), with comorbidity was (aHR=0.80, 95% CI: 0.36-1.76), 2.The combined effect with risk of pancreatitis incidence: preeclampsia and alcohol-related (aHR=43.4, 95% CI: 6.06-311.3), preeclampsia and biliary stone (aHR=3.63, 95% CI: 1.59-8.27), preeclampsia and diabetes mellitus (aHR=5…	Moderate
43	Deana J. Hussamy	2019	Number of Risk Factors in Down Syndrome Pregnancies	Retrospective cohort study	Texas, the US	January 2009 to December 2015	125 Singleton pregnancies with delivery of live born or stillborn infant with Down syndrome	To evaluate the prevalence of risk factors, alone and in combination, in pregnancies with fetal Down syndrome, in an effort to characterize the efficacy of population-based screening and thereby improve counseling.	Data were extracted from an obstetrical database that contains selected pregnancy outcomes and neonatal outcomes for all deliveries at our hospital, including a description of structural and karyotypic abnormalities.	The number of risk factors	-	The co-existence of the following risk factors: maternal age ≥35 years at delivery, abnormal aneuploidy screening, minor ultrasound marker(s), and sonographic identification of a major anomaly. (4 risk factors)	1.More pregnancies had multiple risk factors than had a single risk factor, 90 (72%) versus 30 (24%), p < 0.001. 2.35(28%) of affected pregnancies occurred in women with two risk factor categories,36( 29%) with three, and 19(15%) with all four risk factor categories.	Moderate
44	Gladys Ibanez	2012	Depression and anxiety in women during pregnancy and neonatal outcome: Data from the EDEN mother–child cohort	Observational cohort study	Nancy and Poitiers, France	September 2003 to January 2006	1,719 women recruited before the 20th gestational week.	To analyze the relationship between depression and anxiety of women during pregnancy and neonatal outcomes.	The Center for Epidemiological Studies-Depression scale (CES-D) and the State Trait Inventory Anxiety (the “state” component of the STAI)	Depression and anxiety	Pregnancy and neonatal outcomes.	Comorbid depression and anxiety. (2 risk factors)	1.From the 1719 women included in the study, 13.2% (n=227) were classified as “depressed and anxious”. 2.Depression combined with anxiety during pregnancy with the risk of preterm birth (Odds Ratio: 1.61 [0.88–2.94]) ,spontaneous PB (Odds Ratio: 2.47 [1.27–4.80]), indicated PB (Odds Ratio: 0.41 [0.09–1.86]), Centiles according to customized curvesf Small-for-gestational age (Odds Ratio:1.18 [0.76…	Moderate
45	Jennifer Jardine	2020	Risk of complicated birth at term in nulliparous and multiparous women using routinely collected maternity data in England: cohort study	Cohort study	England	April 2015 to March 2016	276,766 women with a singleton birth at term	To determine the rate of complicated birth at term in women classified at low risk according to the National Institute for Health and Care Excellence guideline for intrapartum care (no pre-existing medical conditions, important obstetric history, or complications during pregnancy) and to assess if the risk classification can be improved by considering parity and the number of risk factors.	Data was collated from extracts of the routinely collected electronic Maternity Information Systems (MIS) of English National Health Service hospitals by the National Maternity and Perinatal Audit.	Low, intermediate, and increased risk group, defined by risk factors identified in the NICE guideline	Composite outcome of complicated birth (defined as a birth with any of the following events: use of an instrument (forceps or vacuum device), emergency caesarean delivery, obstetric anal sphincter injury, postpartum haemorrhage, or neonate born with an Apgar score of 7 or less at five minutes).	Age, BMI, pre-existing medical conditions, important obstetric history, and complications in current pregnancy. (4 risk factors)	1.In intermediated risk group: nulliparous women with two risk factors had the rates of complicated birth. [51.9% (421 of 811 women, 48.4% to 55.4%)] multiparous women without a history of caesarean section, with two risk factors, had the rates of complicated birth. [12.0% (364 of 3032 women, 10.9% to 13.2%)] multiparous women without a history of caesarean section, with three risk factors, had t…	Moderate
46	Azam Kouhkan	2018	Obstetric and perinatal outcomes of singleton pregnancies conceived via assisted reproductive technology complicated by gestational diabetes mellitus: a prospective cohort study	Prospective cohort study	Tehran, Iran	November 2014 to January 2017	574 pregnant women	To compare obstetric and perinatal outcomes of GDM between singleton pregnancies achieved by ART and those of spontaneous pregnancies, in order to have a clearer understanding of maternal and infant health under such conditions.	Data were obtained from patients’ medical records and hospital databases and through face-to-face interviews.	Assisted reproductive technology (ART) and spontaneous conception (SC)	Pregnancy outcomes [including pregnancy-induced hypertension (PIH), preeclampsia, antepartum hemorrhage (APH), cesarean section (CS), preterm birth (PTB), intrauterine growth restriction (IUGR), being small or large for gestational age (SGA or LGA), macrosomia, low birth weight (LBW), respiratory distress, neonatal hypoglycemia, NICU admission and perinatal mortality from antenatal visits to deli…	The co-existence of assisted reproductive technology and gestational diabetes mellitus. (2 risk factors)	1.ART-GDM (135, 23.5%). 2.ART-GDM group had a higher risk (95% confidence interval) of obstetric complications including PIH [aOR:7.04 (2.24–22.15)], preeclampsia [aOR:7.78 (1.62–37.47)], APH [aOR:3.46 (1.28–9.33)], emergency CS [aOR:2.64 (1.43–4.88)], and perinatal outcomes such as PTB [aOR:3.89 (1.51–10.10)], LBW [aOR:3.11 (1.04–9.30)] and NICU admission [aOR:4.36 (1.82–10.45)], as well as neon…	Moderate
