# Supplementary material for: Measurement, prevalence, causes, and health outcomes of co-existing multiple high-risk factors in pregnancy: a systematic review and meta-analysis
Source: Research Square preprint supplement (doi:10.21203/rs.3.rs-2336304/v1), 2022-12-09
Supplement: Supplementary file 2 [file 158b50873c6e198b3cb00ed5.docx]

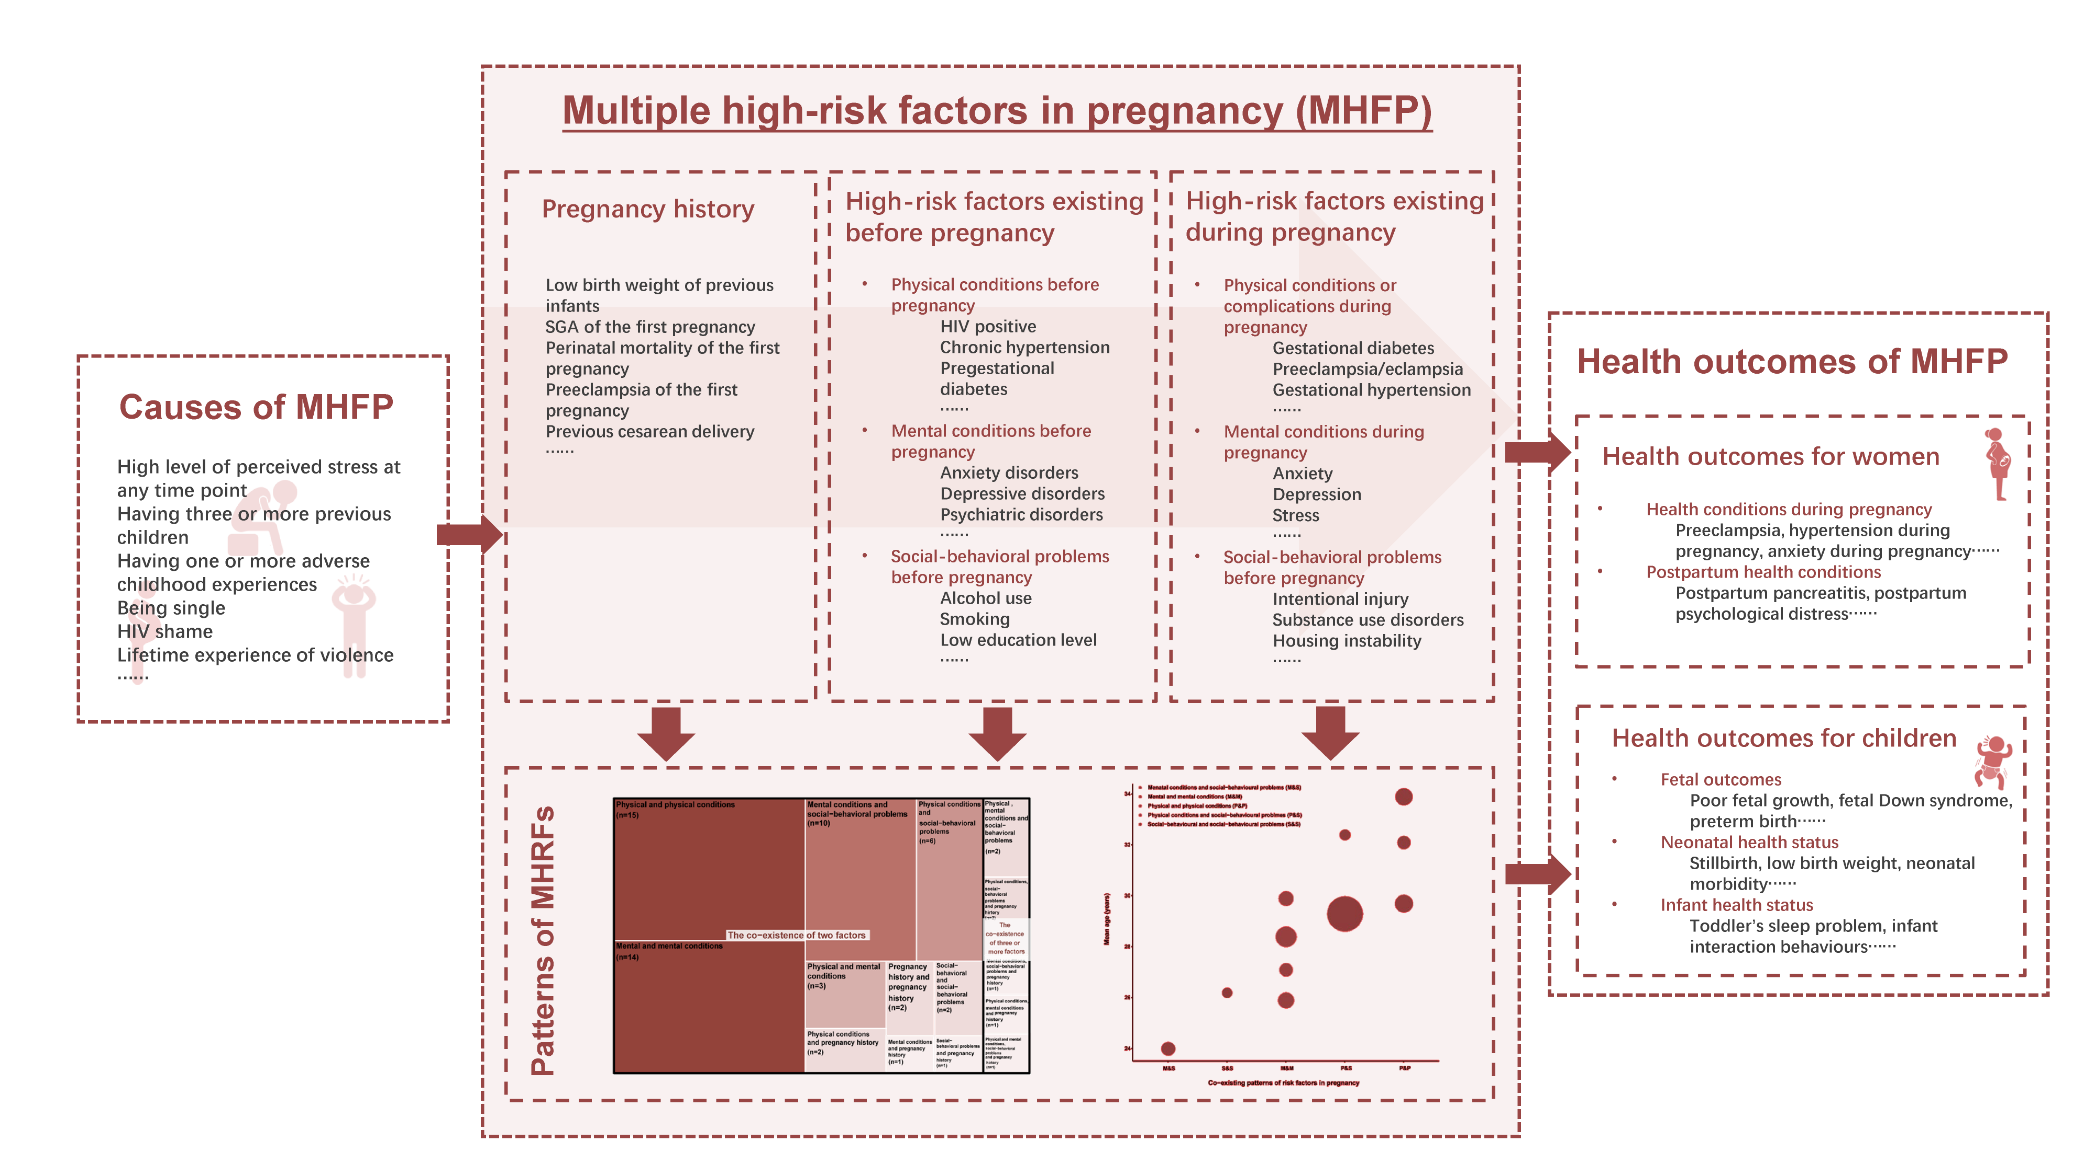


Graphic Abstract. Conceptual framework for systematic review of co-existence of multiple high-risk factors in pregnancy.
