# Supplementary material for: Measurement, prevalence, causes, and health outcomes of co-existing multiple high-risk factors in pregnancy: a systematic review and meta-analysis
Source: Research Square preprint supplement (doi:10.21203/rs.3.rs-2336304/v1), 2022-12-09
Supplement: Supplementary file 4 [file 3242bdcbf83dbffd4dacbdee.docx]

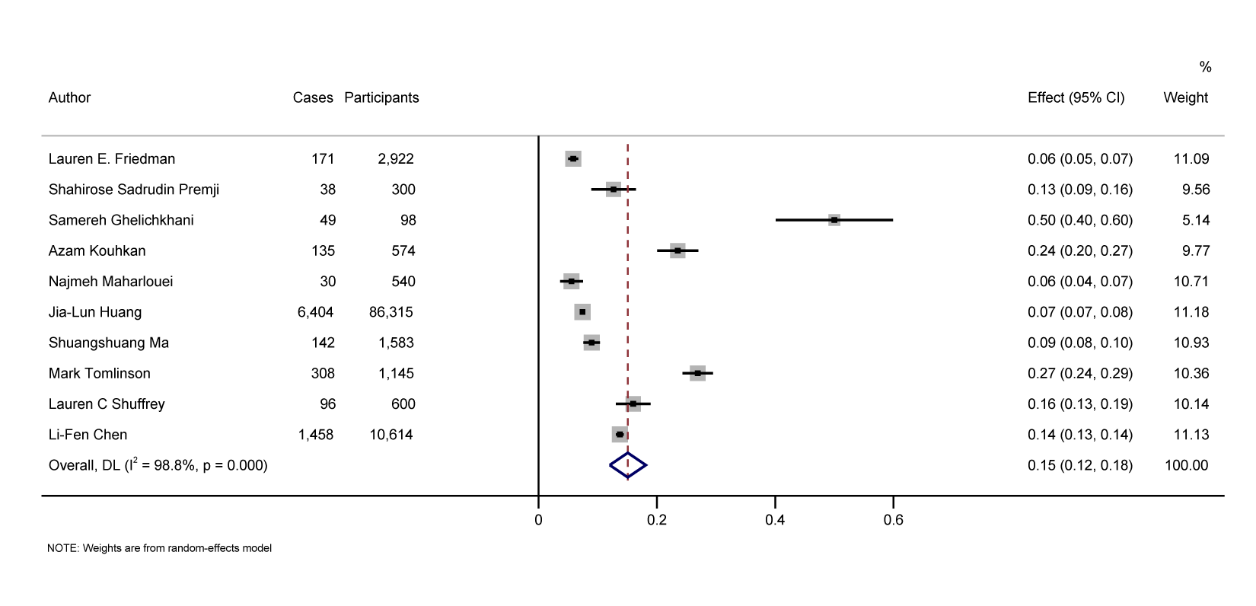


Additional file 8. Random effects meta-analysis pooled prevalence estimates and forest plots for the co-existence of two or more risk factors in pregnancy in low- and middle-income countries.
