# Supplementary material for: Measurement, prevalence, causes, and health outcomes of co-existing multiple high-risk factors in pregnancy: a systematic review and meta-analysis
Source: Research Square preprint supplement (doi:10.21203/rs.3.rs-2336304/v1), 2022-12-09
Supplement: Supplementary file 5 [file 6c555b21b19c2ead86de7dd9.docx]

**Identification**

**Screening**

**Included**

Records identified through database searching

(n = 16701)

PubMed = 4742

Embase = 7750

Web of Science = 4209

Records after duplicates removed

(n = 10502)

10502 of records screened for title and abstract

Irrelevant titles or abstracts excluded

(n = 10303)

Full-text articles assessed for eligibility

(n = 199)

153 of full-text articles excluded, with reasons

- Not original article (n = 9)
- Do not mention the co-existence of high-risk factors of pregnancy (n = 86)
- No relevant information on multiple high-risk factors of pregnancy (n = 21)
- Abstract only (n = 30)
- The full text was not available (n = 7)

Studies included in the review

(n = 46)

Additional file 3. Process of the study selection.
