# Supplementary material for: Measurement, prevalence, causes, and health outcomes of co-existing multiple high-risk factors in pregnancy: a systematic review and meta-analysis
Source: Research Square preprint supplement (doi:10.21203/rs.3.rs-2336304/v1), 2022-12-09
Supplement: Supplementary file 7 [file a99c6b33c56dfb61bcba9086.docx]

Additional file 1. Search strategies of the systematic review.

| Database |  | Search Query | Results |
| --- | --- | --- | --- |
| PubMed | #1 | (multiple risk factor*[Title/Abstract]) OR (multiple high risk factor*[Title/Abstract]) OR (multiple high-risk factor*[Title/Abstract]) OR (overlapping risk factor*[Title/Abstract]) OR (coexisting risk factor*[Title/Abstract]) OR (co-existing risk factor*[Title/Abstract]) OR (co-occurrence risk factor*[Title/Abstract]) OR (co-occur risk factor*[Title/Abstract]) OR (co-existence risk factor*[Title/Abstract]) OR (coexistence risk factor*[Title/Abstract]) OR (co-occurring risk factor*[Title/Abstract]) OR (cooccurring risk factor*[Title/Abstract]) | 12,622 |
| #2 | (multiple complication*[Title/Abstract]) OR (overlapping complication*[Title/Abstract]) OR (coexisting complication*[Title/Abstract]) OR (co-existing complication*[Title/Abstract]) OR (co-occurrence complication*[Title/Abstract]) OR (co-occur complication*[Title/Abstract]) OR (accompanied complication*[Title/Abstract]) OR (multimorbid*[Title/Abstract]) OR (comorbid*[Title/Abstract]) OR (multiple condition*[Title/Abstract]) OR (multiple chronic condition*[Title/Abstract])OR (multiple morbid*[Title/Abstract]) OR (co-existence complication*[Title/Abstract]) OR (coexistence complication*[Title/Abstract]) OR (co-occurring complication*[Title/Abstract]) OR (cooccuring complication*[Title/Abstract]) | 244,233 |
| #3 | syndemic[Title/Abstract] | 822 |
| #4 | #1 OR #2 OR #3 | 255,418 |
| #5 | (pregnan*[Title/Abstract]) OR (maternal[Title/Abstract]) OR (maternity[Title/Abstract]) OR (gestation*[Title/Abstract]) OR (pre-pregnan*[Title/Abstract]) OR (perinatal[Title/Abstract]) OR (prenatal[Title/Abstract]) OR (obstetric[Title/Abstract]) OR (parturition[Title/Abstract]) | 929,338 |
| #6 | #4 AND #5, Filters: humans, female, English. | 4,742 |
| Embase | #1 | 'multiple risk factor*':ti,ab,kw OR 'multiple high risk factor*':ti,ab,kw OR 'multiple high-risk factor*':ti,ab,kw OR 'overlapping risk factor*':ti,ab,kw OR 'coexisting risk factor*':ti,ab,kw OR 'co-existing risk factor*':ti,ab,kw OR 'co-occurrence risk factor*':ti,ab,kw OR 'co-occur risk factor*':ti,ab,kw OR 'co-existence risk factor*':ti,ab,kw OR 'coexistence risk factor*':ti,ab,kw OR 'co-occurring risk factor*':ti,ab,kw OR 'cooccurring risk factor*':ti,ab,kw | 8,004 |
| #2 | 'multiple complication*':ti,ab,kw OR 'overlapping complication*':ti,ab,kw OR 'coexisting complication*':ti,ab,kw OR 'co-existing complication*':ti,ab,kw OR 'co-occurrence complication*':ti,ab,kw OR 'co-occurr complication*':ti,ab,kw OR 'accompanied complication*':ti,ab,kw OR multimorbid*:ti,ab,kw OR comorbid*:ti,ab,kw OR 'multiple condition*':ti,ab,kw OR 'multiple morbid*':ti,ab,kw OR 'co-existence complication*':ti,ab,kw OR 'coexistence complication*':ti,ab,kw OR 'co-occurring complication*':ti,ab,kw OR 'cooccurring complication*':ti,ab,kw | 417,253 |
| #3 | syndemic:ti,ab,kw | 895 |
| #4 | #1 OR #2 OR #3 | 425,450 |
| #5 | pregnan*:ti,ab,kw OR maternal:ti,ab,kw OR maternity:ti,ab,kw OR gestation*:ti,ab,kw OR 'pre pregnan*':ti,ab,kw OR perinatal:ti,ab,kw OR prenatal:ti,ab,kw OR obstetric:ti,ab,kw OR parturition:ti,ab,kw | 1,200,547 |
| #6 | #4 AND #5 AND [female]/lim AND [humans]/lim AND [english]/lim | 7,750 |
| Web of Science | #1 | AB=(“multiple risk factor*” OR “multiple high risk factor*” OR “multiple high-risk factor*” OR “overlapping risk factor*” OR “coexisting risk factor*” OR “co-existing risk factor*” OR “co-occurrence risk factor*” OR “co-occur risk factor*” OR “co-existence risk factor*” OR “coexistence risk factor*” OR “co-occurring risk factor*” OR “cooccurring risk factor*”) AND LA=(English) | 4,005 |
| #2 | TI=(“multiple risk factor*” OR “multiple high risk factor*” OR “multiple high-risk factor*” OR “overlapping risk factor*” OR “coexisting risk factor*” OR “co-existing risk factor*” OR “co-occurrence risk factor*” OR “co-occur risk factor*” OR “co-existence risk factor*” OR “coexistence risk factor*” OR “co-occurring risk factor*” OR “cooccurring risk factor*”) AND LA=(English) | 431 |
| #3 | #1 OR #2 | 4,239 |
| #4 | AB=(“multiple complication*” OR “overlapping complication*” OR “coexisting complication*” OR “co-existing complication*” OR “co-occurrence complication*” OR “co-occur complication*” OR “accompanied complication*” OR “multimorbid*” OR “comorbid*” OR “multiple condition*” OR “multiple chronic condition*” OR “multiple morbid*” OR “co-existence complication*” OR “coexistence complication*” OR “co-occurring complication*” OR “cooccuring complication*”) AND LA=(English) | 164,597 |
| #5 | TI=(“multiple complication*” OR “overlapping complication*” OR “coexisting complication*” OR “co-existing complication*” OR “co-occurrence complication*” OR “co-occur complication*” OR “accompanied complication*” OR “multimorbid*” OR “comorbid*” OR “multiple condition*” OR “multiple chronic condition*” OR “multiple morbid*” OR “co-existence complication*” OR “coexistence complication*” OR “co-occurring complication*” OR “cooccuring complication*”) AND LA=(English) | 20,444 |
| #6 | #4 OR #5 | 167,129 |
| #7 | AB=("syndemic") AND LA=(English) | 596 |
| #8 | TI=("syndemic") AND LA=(English) | 306 |
| #9 | #7 OR #8 | 638 |
| #10 | #3 OR #6 OR #9 | 171,699 |
| #11 | AB=(“pregnan*” OR “maternal” OR “maternity” OR “gestation*” OR “pre-pregnan*” OR “perinatal” OR “prenatal” OR “obstetric” OR “parturition”) AND LA=(English) | 558,119 |
| #12 | TI=(“pregnan*” OR “maternal” OR “maternity” OR “gestation*” OR “pre-pregnan*” OR “perinatal” OR “prenatal” OR “obstetric” OR “parturition”) AND LA=(English) | 289,815 |
| #13 | #11 OR #12 | 634,296 |
| #14 | #10 AND #13 | 4,209 |
