# Supplementary material for: Measurement, prevalence, causes, and health outcomes of co-existing multiple high-risk factors in pregnancy: a systematic review and meta-analysis
Source: Research Square preprint supplement (doi:10.21203/rs.3.rs-2336304/v1), 2022-12-09
Supplement: Supplementary file 9 [file e6a30b0c71eb08d6df47ed01.docx]

Additional file 4. Number of studies for the co-existing patterns of high-risk factors in pregnancy.

| **Co-existent patterns of high-risk factors in pregnancy** | **Number of studies** |
| --- | --- |
| Anxiety and depression | 10 |
| Advanced maternal age and gestational diabetes | 3 |
| Maternal obesity and gestational diabetes | 3 |
| Chronic hypertension and pregestational diabetes | 2 |
| Pre-eclampsia and gestational diabetes | 2 |
| Polycystic ovarian syndrome and gestational diabetes | 2 |
| HIV and depression | 1 |
| Alcohol use and depression | 1 |
| HIV and alcohol use | 1 |
| Had a previous low birth weight infant and depression | 1 |
| HIV and had a previous low birth weight infant | 1 |
| Alcohol use and had a previous low birth weight infant | 1 |
| Mental illness and intentional injury during pregnancy | 1 |
| Intentional injury and substance abuse during pregnancy | 1 |
| Prenatal stress and anxiety | 1 |
| Twin pregnancy and early vaginal bleeding | 1 |
| Opioid use disorder and psychiatric disorders | 1 |
| Opioid use disorder and hepatitis C infection | 1 |
| Opioid use disorder and marijuana | 1 |
| Opioid use disorder and cocaine | 1 |
| Opioid use disorder and supplement of buprenorphine | 1 |
| Advanced maternal age and hypertensive disorders | 1 |
| Advanced maternal age and asthma | 1 |
| Intellectual and developmental disabilities and mental Illness | 1 |
| Perinatal depression and antidepressants | 1 |
| Gestational diabetes and family history of diabetes mellitus | 1 |
| Gestational diabetes and order of index delivery ≥2nd | 1 |
| Gestational diabetes and history of diabetes | 1 |
| Poor sleep and depressive symptoms during pregnancy | 1 |
| Mood and migraine disorders during pregnancy | 1 |
| Chronic medical condition and poverty | 1 |
| Prenatal depression and diabetes | 1 |
| Prenatal depression and high blood pressure | 1 |
| Prenatal depression and kidney problems | 1 |
| Anxiety and diabetes | 1 |
| Anxiety and high blood pressure | 1 |
| Anxiety and kidney problems | 1 |
| Migraine and depression | 1 |
| SARS-Cov-2-infected and with underlying diseases | 1 |
| Preeclampsia and alcohol-related disease | 1 |
| Preeclampsia and biliary stone | 1 |
| Preeclampsia and hyperlipidemia | 1 |
| Preeclampsia and hypertension | 1 |
| Preeclampsia and hepatitis B | 1 |
| Preeclampsia and hepatitis C | 1 |
| Preeclampsia and advanced maternal age | 1 |
| Advanced maternal age and abnormal aneuploidy serum | 1 |
| Advanced maternal age and minor ultrasound marker(s) | 1 |
| Abnormal aneuploidy serum and minor ultrasound marker(s) | 1 |
| Abnormal aneuploidy serum and anomaly | 1 |
| Minor ultrasound marker(s) and anomaly | 1 |
| Assisted reproductive technology and gestational diabetes mellitus during pregnancy | 1 |
| HIV, alcohol use prior to pregnancy, and depression during pregnancy | 1 |
| HIV, had a previous low birth weight infant, and depression | 1 |
| Alcohol use prior to pregnancy, had a previous low birth weight infant, and depression during pregnancy | 1 |
| HIV, alcohol use prior to pregnancy, and had a previous low birth weight infant | 1 |
| Mental illness during pregnancy, intentional injury during pregnancy and substance abuse during pregnancy | 1 |
| Prenatal depression, stress and anxiety | 1 |
| Depression, anxiety and HIV | 1 |
| Bipolar disorder with depression and anxiety during pregnancy | 1 |
| Perinatal depression, antidepressants and anxiety disorder | 1 |
| Perinatal depression, antidepressants and multiple gestation | 1 |
| Perinatal depression, antidepressants and diabetes mellitus | 1 |
| Perinatal depression, antidepressants and hypertension | 1 |
| Perinatal depression, antidepressants and dyslipidemia | 1 |
| Perinatal depression, antidepressants and reproductive tract infection | 1 |
| Perinatal depression, antidepressants and pre-eclampsia | 1 |
| Perinatal depression, antidepressants and placenta previa | 1 |
| Perinatal depression, antidepressants and polycystic ovaries | 1 |
| Perinatal depression, antidepressants and pregnancy with history of infertility | 1 |
| Advanced maternal age, abnormal aneuploidy serum and minor ultrasound marker(s) | 1 |
| Advanced maternal age, abnormal aneuploidy serum and anomaly | 1 |
| Abnormal aneuploidy serum, minor ultrasound marker(s) and detection of a major fetal anomaly | 1 |
| Small for gestational age of the first pregnancy, perinatal mortality of the first pregnancy and preeclampsia of the first pregnancy | 1 |
| Obesity, advanced maternal age, and parity ≥4 | 1 |
| HIV, alcohol use prior to pregnancy, had a previous low birth weight infant and depression during pregnancy | 1 |
| Depression symptoms and more than four adverse social determinants | 1 |
| High stress, smoking, drug use, unmarried, medicated, and late prenatal care | 1 |
| Previous caesarean section, obesity, pre-existing medical conditions, important obstetric history, important obstetric history | 1 |
| Unmarried, first birth, young mother (age ≤18), low education and medicated | 1 |
